# Supplementary material
Source: Research Square preprint supplement (doi:10.21203/rs.3.rs-8201060/v1)
Supplement: Supplementary file 1 [file ec100d58f7d40608f827b87e.docx]

**Acknowledgment**

Contributing to the study protocol were Lennart Hansson [1], Björn Dahlöv [1], Per Mårin [1], and Per Björntorp [1]. The project was led by Lennart Dimberg at Volvo assisted by Lars Kumlin [2]. For Renault the leadership came from Catherine Lanoiselée/Guillemette Latscha [3]. The scientific leadership was provided by Alain Simon, with support from Jaime Levenson [4].

In Sweden, Bo Eriksson from the Nordic School of Public Health was responsible for the statistical calculations [5], aided by Nils Gunnar Pehrsson [6], Henrik Ahlbom [6], and Maria Persson [6]. Mats Andrén [1] played a key role in setting up the data input software.

In France, Marc Massonneau [7], and Nicolas Denarié [4] conducted the statistical calculations.

Additional contribution from Broussais Hospital included Jérôme Gariépy, and Gilles Chironi [4]. Alain Simon [4] was responsible for the Ultrasonography Study Protocol in collaboration with Marc Massonneau [7] and Sverker Jern [1]. Jaime Levenson [4] led the Blood Viscosimetry Protocol in partnership with Lena Sjögren, Astra-Zeneca. Blood hormone analyses were performed by Carola Gustafsson [1], and EKG analyses were conducted by Margareta Leijon [1]. Kristina Orth-Gomér [8] contributed to the design of the psychological questions, particularly for steps 2 and 3, as well as in the writing of several papers and mentoring Lars Kumlin [2]. Leif Wallin [9] and Gisela Rose [9] contributed to the design of the psychosocial questions and analyses. Several physicians from Volvo particularly Carl-Erik Hedström [9] and Irma Wright [9], as well as from Renault- Madeleine Leroy, Olivier Galamond, Christine Morvan, Sylvie Selosse and Jacques Sissler [3]- also contributed to the study.

Richard Sloan [10] and Thomas Bigger [10] designed the Holter EKG protocol and analyses, which were conducted exclusively on Swedish men.

The baseline investigations at Volvo were carried out by Siv Thornell [2], Lisbeth Paffrath [9], and Pia Johannisson [9]. The second-step investigations were conducted by Siv Thornell [2]. Lena Rossander-Hulthén [1] developed the Diet Study Protocol aided by dietician Kerstin Terning [1], and viscosimetry analyses were conducted by laboratory technician Lillemor Engström. [11].

Christer Erkenborg [2] was pivotal in the practical and technical arrangements at Volvo Aero Corporation.

The third step interviews were conducted by Siv Thornell [2], Annie Jansson [1], Caroline Karlsson, Inga-Greta Wittlöv, and Pia Lindén.

Xiaodong Cai [12] at the World Bank, Washington, DC contributed to statistical analyses and results from two of the studies.

The study benefited from the professional secretarial support of Britt Lindström [2], and Maria Ortega [4], and the financial coordination provided by Marianne Berlin [2], and Kenneth Schultz [2].

Language revisions were assisted by Sandra Ross [12] and Lorraine Nagy [12].

The project was fully financed by the Volvo and Renault enterprises. Special thanks are extended to Bernard Demure, Director of the World Bank Health Services Department, who was involved in the early planning while employed by Renault, and facilitated the integration of the Coeur project into Lennart Dimberg’s work program at the World Bank.

Finally, gratitude is expressed to recent medical master’s students at Gothenburg University for their published in-depth analyses of various aspects of cardiovascular risk factors in the Swedish cohort:

Rebecca Heimann/Vella, Per Enqvist, Mohammed Hashem, Isabelle Torenfält, Lala Joulha Ian, Abdinasir Hussein, through invaluable statistical support provided by Akademistatistik (1).

*All affiliations are given at the time of the study, or publications.*

[1] Sahlgren’s/Östra/Vasa hospital, Gothenburg, Sweden

[2] Health Department,Volvo Aero Corporation, Trollhättan, Sweden

[3] Service Medical, Renault Automobiles, Billancourt, France

[4] Broussais Hospital, Paris, France

[5] Nordic School of Public Health, Gothenburg Sweden

[6] Statistiska konsultgruppen, Gothenburg, Sweden

[7] IODP, Paris, France

[8] Department of Preventive Medicine, Karolinska Institute, Stockholm, Sweden

[9] Volvo, Gothenburg, Sweden

[10] Columbia-Presbyterian Medical Center, New York

[11] Norra Älvsborgs Länssjukhus, Trollhättan, Sweden

[12] The World Bank, Washington DC, USA
